# Supplementary material
Source: MDPI journal article supplement (https://www.mdpi.com/2297-8739/10/5/286)
Supplement: s1 [file s1]

Table S1. Separation factors of  $M^{n+}$  metal ions extracted with  $HP=2 \times 10^{-2}$  mol/dm<sup>3</sup> ligand in  $[C_1C_4im^+][Tf_2N^-]$  applying EtG and  $H_2O$ .

| SF | Fe   | $H_2O$               | Ni                   | Cu    | $H_2O$             | Eu   | $H_2O$               | Gd   | $H_2O$             | Lu   | $H_2O$             | Hg                   | $H_2O$ | Tl   | $H_2O$             | Bi   | $H_2O$ |
|----|------|----------------------|----------------------|-------|--------------------|------|----------------------|------|--------------------|------|--------------------|----------------------|--------|------|--------------------|------|--------|
| Al | 22.7 | $3.3 \times 10^{-3}$ | $9.3 \times 10^{-2}$ | 30.2  | $2 \times 10^{-2}$ | 6.2  | $3.8 \times 10^{-2}$ | 19.7 | $8 \times 10^{-2}$ | 19.3 | $3 \times 10^{-2}$ | 0.24                 | 1.74   | 8.8  | $4 \times 10^{-2}$ | 9.2  | 0.3    |
| Fe |      |                      | $4 \times 10^{-3}$   | 1.3   | 5.9                | 0.27 | 11.53                | 0.86 | 24.6               | 0.84 | 9.75               | $1 \times 10^{-2}$   | 525.6  | 0.38 | 12.5               | 0.4  | 92.3   |
| Ni |      |                      | —                    | 324.2 | —                  | 66.3 | —                    | 211  | —                  | 207  | —                  | 2.55                 | —      | 94.5 | —                  | 98.8 | —      |
| Cu |      |                      |                      |       |                    | 0.2  | 1.9                  | 0.65 | 4.11               | 0.63 | 1.63               | $7 \times 10^{-3}$   | 87.8   | 0.29 | 2.08               | 0.30 | 15.4   |
| Eu |      |                      |                      |       |                    |      |                      | 3.2  | 2.13               | 3.12 | 0.84               | $4 \times 10^{-2}$   | 45.5   | 1.42 | 1.08               | 1.48 | 8.0    |
| Gd |      |                      |                      |       |                    |      |                      |      |                    | 0.97 | 0.39               | $1.2 \times 10^{-2}$ | 21.35  | 0.44 | 0.5                | 0.46 | 3.75   |
| Lu |      |                      |                      |       |                    |      |                      |      |                    |      |                    | $1.2 \times 10^{-2}$ | 53.7   | 0.45 | 1.27               | 0.47 | 9.43   |
| Hg |      |                      |                      |       |                    |      |                      |      |                    |      |                    |                      |        | 36.9 | $2 \times 10^{-2}$ | 38.6 | 0.17   |
| Tl |      |                      |                      |       |                    |      |                      |      |                    |      |                    |                      |        |      |                    | 1.04 | 7.4    |

Table S2. Initial concentrations of metal ions used in competitive extraction after 7 and 6.3-fold dilution.

| $M^{n+}$                              | $Li^+$                 | $Na^+$                 | $K^+$                  | $Ca^{2+}$              | $Ag^+$                 | $Tl^+$                 | $Sr^{2+}$              | $Ba^{2+}$              | $Co^{2+}$              | $Cu^{2+}$              | $Ni^{2+}$              | $Hg^{2+}$              |
|---------------------------------------|------------------------|------------------------|------------------------|------------------------|------------------------|------------------------|------------------------|------------------------|------------------------|------------------------|------------------------|------------------------|
| $[M^{n+}]_{in}$<br>mg/dm <sup>3</sup> | 0.39±0.03<br>0.23±0.01 | 0.56±0.02<br>0.79±0.02 | 0.92±0.02<br>1.14±0.01 | 1.12±0.04<br>1.79±0.06 | 2.85±0.02<br>3.94±0.04 | 1.44±0.05<br>2.44±0.26 | 0.25±0.02<br>2.11±0.01 | 3.37±0.01<br>5.23±0.04 | 1.46±0.01<br>2.32±0.01 | 1.52±0.05<br>2.82±0.02 | 1.19±0.01<br>1.89±0.02 | 6.73±0.04<br>13.22±2.4 |
| $M^{n+}$                              | $Pb^{2+}$              | $Al^{3+}$              | $Bi^{3+}$              | $Fe^{3+}$              | $Cr^{3+}$              | $Mg^{2+}$              | $La^{3+}$              | $Ce^{3+}$              | $Eu^{3+}$              | $Gd^{3+}$              | $Lu^{3+}$              |                        |
| $[M^{n+}]_{in}$<br>mg/dm <sup>3</sup> | 5.54±0.05<br>9.85±0.18 | 1.52±0.03<br>2.74±0.06 | 1.28±0.05<br>2.96±0.32 | 1.17±0.01<br>2.06±0.16 | 0.98±0.01<br>1.53±0.04 | 0.68±0.06<br>0.98±0.01 | 1.89±0.01<br>2.55±0.02 | 0.1±0.02<br>—          | 3.71±0.03<br>6.01±0.04 | 2.16±0.01<br>3.08±0.04 | 2.82±0.01<br>4.39±0.02 |                        |

Table S3. Separation factors of  $M^{n+}$  metal ions extracted with  $HP=2 \times 10^{-2}$  mol/dm<sup>3</sup> ligand in  $[C_1C_{10}im^+][Tf_2N^-]$  applying H<sub>2</sub>O and glycerol, 1:1.

| SF | Mg  | Al  | K    | Ca  | Cr   | Fe                   | Co    | Ni                | Cu                 | Zn                | Sr                  | Ag                 | Cd                 | Ba                 | La                 | Ce                 | Eu                 | Gd                 | Lu                   | Hg                 | Tl                 | Pb                 | Bi                 |
|----|-----|-----|------|-----|------|----------------------|-------|-------------------|--------------------|-------------------|---------------------|--------------------|--------------------|--------------------|--------------------|--------------------|--------------------|--------------------|----------------------|--------------------|--------------------|--------------------|--------------------|
| Li | 1.7 | 0.7 | 0.5  | 2.3 | 1.2  | 1x10 <sup>-3</sup>   | 0.3   | 1.3               | 5x10 <sup>-3</sup> | 4.4               | 21.7                | 1.04               | 1.5                | 1.03               | 0.9                | 0.87               | 1.6                | 0.7                | 0.35                 | 1.52               | 0.05               | 0.98               | 0.1                |
| Mg |     | 0.4 | 0.3  | 1.3 | 0.7  | 7x10 <sup>-4</sup>   | 0.14  | 0.75              | 3x10 <sup>-3</sup> | 2.5               | 12.6                | 0.6                | 1.5                | 0.6                | 0.53               | 0.5                | 0.92               | 0.42               | 0.2                  | 0.88               | 3x10 <sup>-2</sup> | 0.6                | 6x10 <sup>-2</sup> |
| Al |     |     | 0.72 | 3.3 | 1.72 | 2x10 <sup>-3</sup>   | 0.35  | 0.54              | 7x10 <sup>-3</sup> | 6.2               | 30.6                | 1.47               | 2.17               | 1.46               | 1.3                | 1.2                | 2.23               | 1.02               | 0.5                  | 2.15               | 6x10 <sup>-2</sup> | 1.4                | 0.14               |
| K  |     |     |      | 4.5 | 0.46 | 2.4x10 <sup>-3</sup> | 0.48  | 2.52              | 1x10 <sup>-2</sup> | 8.6               | 42.2                | 2.03               | 3.0                | 2.02               | 1.7                | 1.7                | 3.08               | 1.4                | 0.7                  | 2.9                | 9x10 <sup>-2</sup> | 1.9                | 0.2                |
| Ca |     |     |      |     | 0.52 | 5x10 <sup>-4</sup>   | 0.1   | 0.55              | 2x10 <sup>-2</sup> | 1.9               | 9.3                 | 0.44               | 0.66               | 0.44               | 0.39               | 0.37               | 0.68               | 0.31               | 0.15                 | 0.65               | 2x10 <sup>-2</sup> | 0.42               | 4x10 <sup>-2</sup> |
| Cr |     |     |      |     |      | 1x10 <sup>-3</sup>   | 0.2   | 1.06              | 4x10 <sup>3</sup>  | 3.6               | 17.8                | 0.85               | 1.26               | 0.85               | 0.74               | 0.72               | 1.3                | 0.6                | 0.3                  | 1.25               | 4x10 <sup>-2</sup> | 0.8                | 8x10 <sup>-2</sup> |
| Fe |     |     |      |     |      |                      | 199.8 | 1x10 <sup>3</sup> | 4.4                | 3x10 <sup>3</sup> | 1.7x10 <sup>4</sup> | 832                | 1x10 <sup>3</sup>  | 826                | 723                | 693                | 1x10 <sup>3</sup>  | 576                | 282                  | 1x10 <sup>3</sup>  | 38.6               | 784                | 82.7               |
| Co |     |     |      |     |      |                      |       | 5.2               | 2x10 <sup>-2</sup> | 17.6              | 86.4                | 4.2                | 6.1                | 4.1                | 3.6                | 3.4                | 6.3                | 2.8                | 1.4                  | 6.07               | 0.2                | 3.9                | 0.4                |
| Ni |     |     |      |     |      |                      |       |                   | 4x10 <sup>-3</sup> | 3.4               | 16.7                | 0.8                | 1.2                | 0.8                | 0.7                | 0.7                | 1.2                | 0.56               | 0.3                  | 1.2                | 3x10 <sup>-2</sup> | 0.76               | 8x10 <sup>-2</sup> |
| Cu |     |     |      |     |      |                      |       |                   |                    | 792               | 3x10 <sup>4</sup>   | 187                | 274                | 184                | 161                | 155                | 281                | 132                | 63                   | 271                | 8.63               | 175                | 18.5               |
| Zn |     |     |      |     |      |                      |       |                   |                    |                   | 4.9                 | 0.24               | 0.2                | 0.23               | 0.2                | 0.2                | 0.35               | 0.16               | 8x10 <sup>-2</sup>   | 0.34               | 1x10 <sup>-2</sup> | 0.22               | 2x10 <sup>-2</sup> |
| Sr |     |     |      |     |      |                      |       |                   |                    |                   |                     | 4x10 <sup>-2</sup> | 7x10 <sup>-2</sup> | 4x10 <sup>-2</sup> | 4x10 <sup>-2</sup> | 4x10 <sup>-2</sup> | 7x10 <sup>-2</sup> | 3x10 <sup>-2</sup> | 1.6x10 <sup>-2</sup> | 7x10 <sup>-2</sup> | 2x10 <sup>-3</sup> | 4x10 <sup>-2</sup> | 4x10 <sup>-3</sup> |
| Ag |     |     |      |     |      |                      |       |                   |                    |                   |                     |                    | 1.4                | 1                  | 0.86               | 0.83               | 1.5                | 0.7                | 0.34                 | 1.4                | 4x10 <sup>-2</sup> | 0.94               | 9x10 <sup>-2</sup> |
| Cd |     |     |      |     |      |                      |       |                   |                    |                   |                     |                    |                    | 0.67               | 0.58               | 0.56               | 1.02               | 0.46               | 0.23                 | 0.98               | 3x10 <sup>-2</sup> | 0.63               | 6x10 <sup>-2</sup> |
| Ba |     |     |      |     |      |                      |       |                   |                    |                   |                     |                    |                    |                    | 0.87               | 0.83               | 1.52               | 0.69               | 0.34                 | 1.47               | 4x10 <sup>-2</sup> | 0.94               | 0.1                |
| La |     |     |      |     |      |                      |       |                   |                    |                   |                     |                    |                    |                    |                    | 0.95               | 1.7                | 0.8                | 0.4                  | 1.6                | 5x10 <sup>-2</sup> | 1                  | 0.1                |
| Ce |     |     |      |     |      |                      |       |                   |                    |                   |                     |                    |                    |                    |                    |                    | 1.8                | 0.83               | 0.4                  | 1.7                | 5x10 <sup>-2</sup> | 1.1                | 0.1                |
| Eu |     |     |      |     |      |                      |       |                   |                    |                   |                     |                    |                    |                    |                    |                    |                    | 0.45               | 0.22                 | 0.96               | 3x10 <sup>-2</sup> | 0.6                | 6x10 <sup>-2</sup> |
| Gd |     |     |      |     |      |                      |       |                   |                    |                   |                     |                    |                    |                    |                    |                    |                    |                    | 0.47                 | 2.1                | 6x10 <sup>-2</sup> | 1.3                | 0.13               |
| Lu |     |     |      |     |      |                      |       |                   |                    |                   |                     |                    |                    |                    |                    |                    |                    |                    |                      | 4.3                | 0.13               | 2.77               | 0.3                |
| Hg |     |     |      |     |      |                      |       |                   |                    |                   |                     |                    |                    |                    |                    |                    |                    |                    |                      |                    | 3x10 <sup>-3</sup> | 0.64               | 6x10 <sup>-2</sup> |
| Tl |     |     |      |     |      |                      |       |                   |                    |                   |                     |                    |                    |                    |                    |                    |                    |                    |                      |                    |                    | 20.3               | 2.2                |
| Pb |     |     |      |     |      |                      |       |                   |                    |                   |                     |                    |                    |                    |                    |                    |                    |                    |                      |                    |                    |                    | 0.1                |

Table S4. Initial concentrations of metal ions used in competitive extraction test applying H<sub>2</sub>O and glycerol, 1:1.

| $M^{n+}$                              | $Li^+$     | $Na^+$    | $K^+$      | $Ca^{2+}$ | $Ag^+$    | $Tl^+$    | $Sr^{2+}$  | $Ba^{2+}$  | $Co^{2+}$ | $Cu^{2+}$ | $Ni^{2+}$  | $Hg^{2+}$  |           |
|---------------------------------------|------------|-----------|------------|-----------|-----------|-----------|------------|------------|-----------|-----------|------------|------------|-----------|
| $[M^{n+}]_{in}$<br>mg/dm <sup>3</sup> | 0.50±0.01  | 2.55±0.02 | 3.10±0.02  | 4.37±0.02 | 7.21±0.10 | 5.16±0.16 | 12.67±0.89 | 10.45±0.06 | 4.37±0.14 | 5.08±0.01 | 3.40±0.02  | 26.69±0.88 |           |
| $M^{n+}$                              | $Pb^{2+}$  | $Al^{3+}$ | $Bi^{3+}$  | $Fe^{3+}$ | $Cr^{3+}$ | $Mg^{2+}$ | $La^{3+}$  | $Ce^{3+}$  | $Eu^{3+}$ | $Gd^{3+}$ | $Lu^{3+}$  | $Zn^{2+}$  | $Cd^{2+}$ |
| $[M^{n+}]_{in}$<br>mg/dm <sup>3</sup> | 17.95±0.10 | 5.99±0.01 | 12.48±0.30 | 4.48±0.20 | 2.85±0.01 | 1.87±0.01 | 10.21±0.01 | 12.39±0.04 | 8.20±0.02 | 7.26±0.01 | 11.41±0.04 | 4.42±0.02  | 9.63±0.04 |

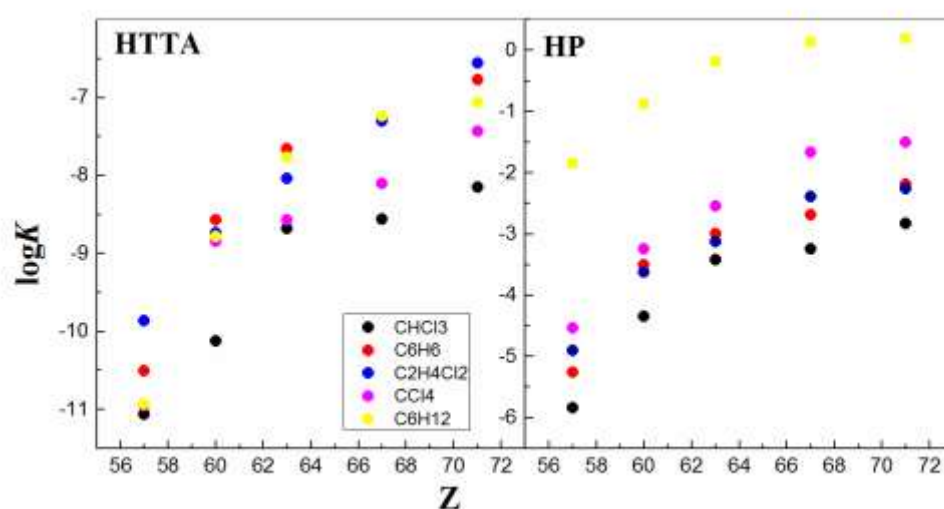

**Figure S1.** LogK vs. Z.

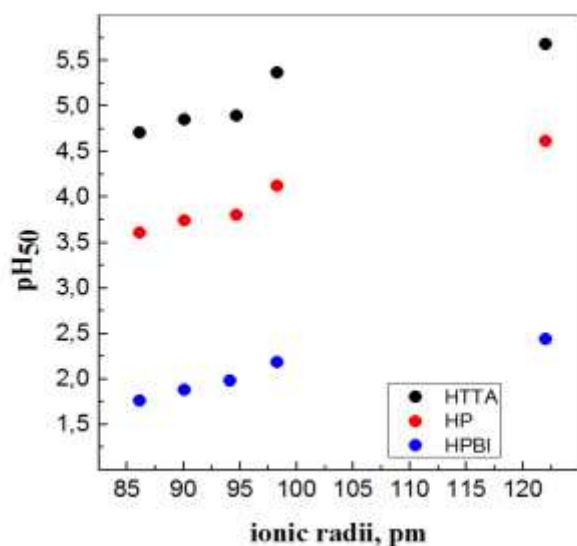

**Figure S2.** pH<sub>50</sub> in the solvent extraction of lanthanoids with HL in CHCl<sub>3</sub> as a function of the ionic radius.

Table S5. Concentrations of the investigated Gd<sup>3+</sup> ions using the SpinCount program, part of the Bruker Xenon software.

| Sample | Concentration [mol/dm <sup>3</sup> ] found in frozen solutions, 120 K |
|--------|-----------------------------------------------------------------------|
| c      | $9.1 \times 10^{-3}$                                                  |
| a      | $1.05 \times 10^{-6}$                                                 |
| b      | $1.7 \times 10^{-7}$                                                  |
| 1      | $2.6 \times 10^{-4}$                                                  |
| 2      | $4.6 \times 10^{-4}$                                                  |
| 3      | $2.5 \times 10^{-4}$                                                  |

Notes: <sup>1</sup>For the calculation of the molar concentrations in the SpinCount program, a spin number S=1/2 was used for solutions 1, 2 and 3, with a single transition -1/2 ↔ +1/2. A spin number S=7/2 is used for solutions a, b and c, where multiple allowed transitions are observed.

<sup>2</sup>The investigated volume of the extracting phase is small, i.e. no 100% LP phase.

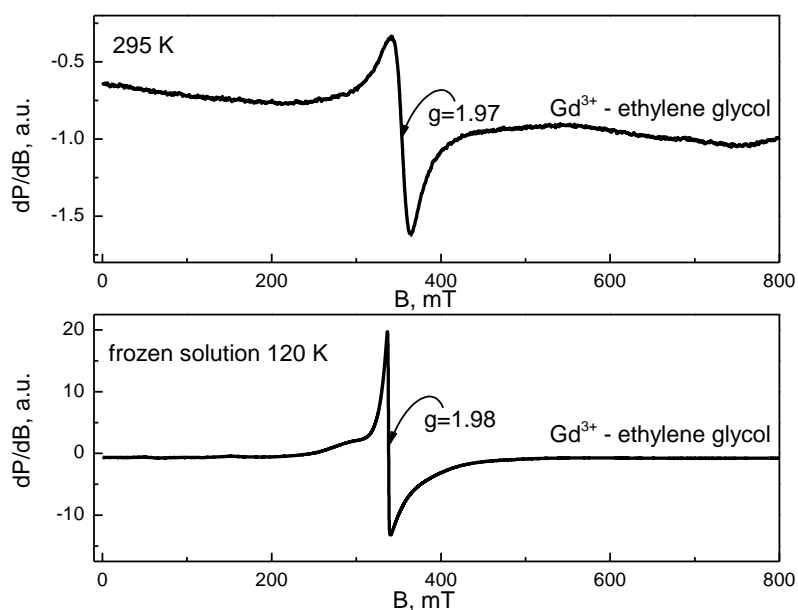

Fig. S3. EPR spectra of  $\text{Gd}^{3+}$  ion in ethylene glycol at room temperature and in the frozen state at 120 K:  $[\text{Gd}^{3+}] = 3 \times 10^{-3} \text{ mol/dm}^3$ .

Table S6. Concentrations of the investigated  $\text{Gd}^{3+}$  ions using the SpinCount program, part of the Bruker Xenon software.

| Sample | Concentration $[\text{mol/dm}^3]$ found in frozen solutions, 120 K |
|--------|--------------------------------------------------------------------|
| C      | Background spectrum                                                |
| A      | $4.115 \times 10^{-4}$                                             |
| B      | $4.075 \times 10^{-4}$                                             |
| 1      | $2.239 \times 10^{-7}$                                             |
| 2      | $3.93 \times 10^{-8}$                                              |
| 3 *    | Background spectrum                                                |
| ZERO   | $1.4 \times 10^{-2}$                                               |

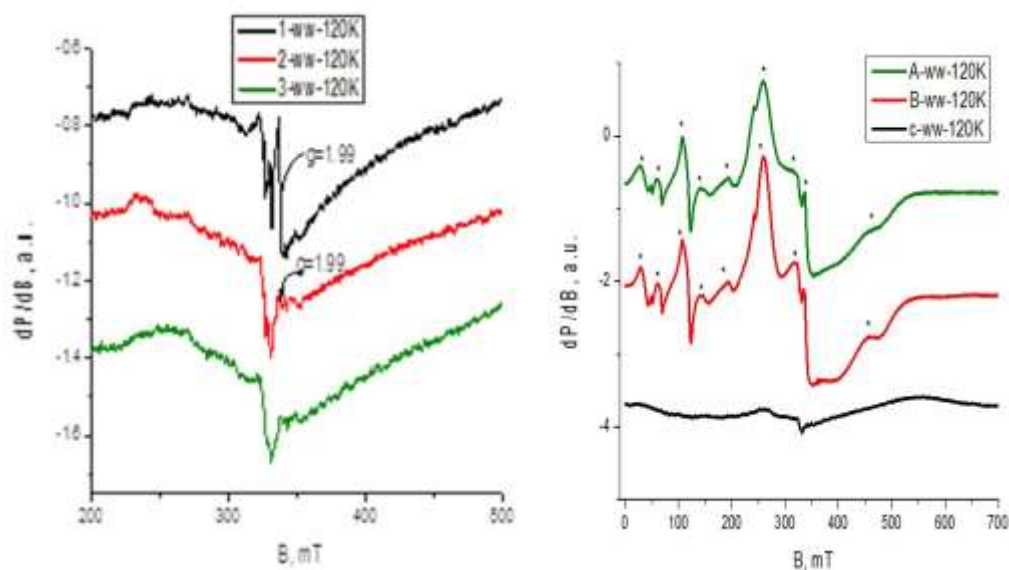

Fig. S4. EPR spectra of frozen solutions of complexes of  $\text{Gd}^{3+}$  ( $[\text{Gd}^{3+}]_{\text{in}} = 6 \times 10^{-4} \text{ mol/dm}^3$ ) with ligands  $[\text{HP}] = 2.5 \times 10^{-2} \text{ mol/dm}^3$  (A, B and C) and  $[\text{HTTA}] = 3 \times 10^{-2} \text{ mol/dm}^3$  (1, 2 and 3) obtained after solvent

extraction from EtG, respectively, in the following diluents  $[\text{C}_1\text{C}_4\text{im}^+][\text{Tf}_2\text{N}^-]$  (A:  $\text{pH}_{\text{eq}}=1.98$  and 1:  $\text{pH}_{\text{eq}}=2.60$ ),  $[\text{C}_1\text{C}_{10}\text{im}^+][\text{Tf}_2\text{N}^-]$  (B:  $\text{pH}_{\text{eq}}=2.02$  and 2:  $\text{pH}_{\text{eq}}=2.57$ ),  $\text{CHCl}_3$ , (C:  $\text{pH}_{\text{eq}}=1.98$  and 3:  $\text{pH}_{\text{eq}}=2.21$ ). On the left: range of the magnetic field 0–700 mT, on the right: range of the magnetic field 300–360 mT.

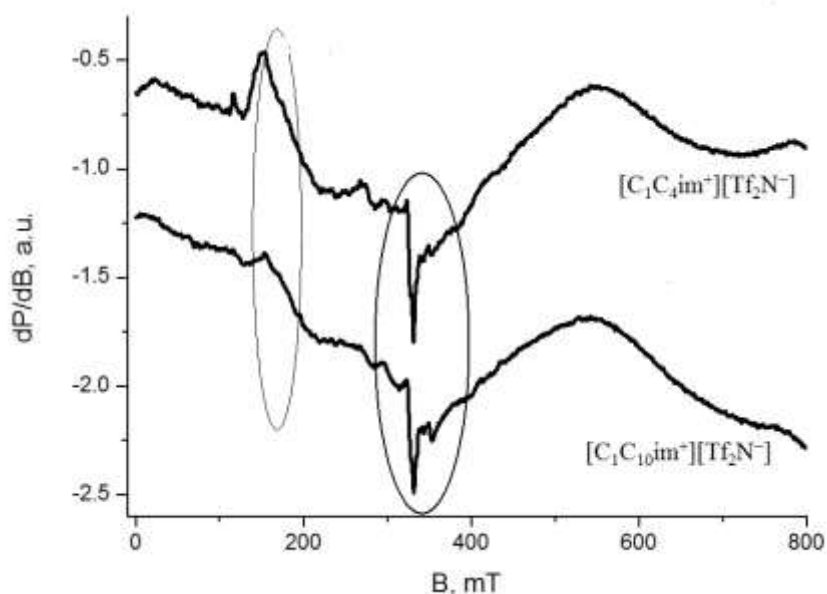

Fig. S5. EPR spectra of  $\text{Cr}^{3+}$  obtained after solvent extraction with  $\text{HP}=2 \times 10^{-2} \text{ mol/dm}^3$  in  $[\text{C}_1\text{C}_4\text{im}^+][\text{Tf}_2\text{N}^-]$  and  $[\text{C}_1\text{C}_{10}\text{im}^+][\text{Tf}_2\text{N}^-]$  recorded in frozen solutions: MP phase –  $[\text{Cr}^{3+}]_{\text{in}}=6 \times 10^{-4} \text{ mol/dm}^3$  and 0.1 MES in EtG. Calculated % E is 71.23% and 54.60% – ICP-OES based on an average of three parallel determinations.

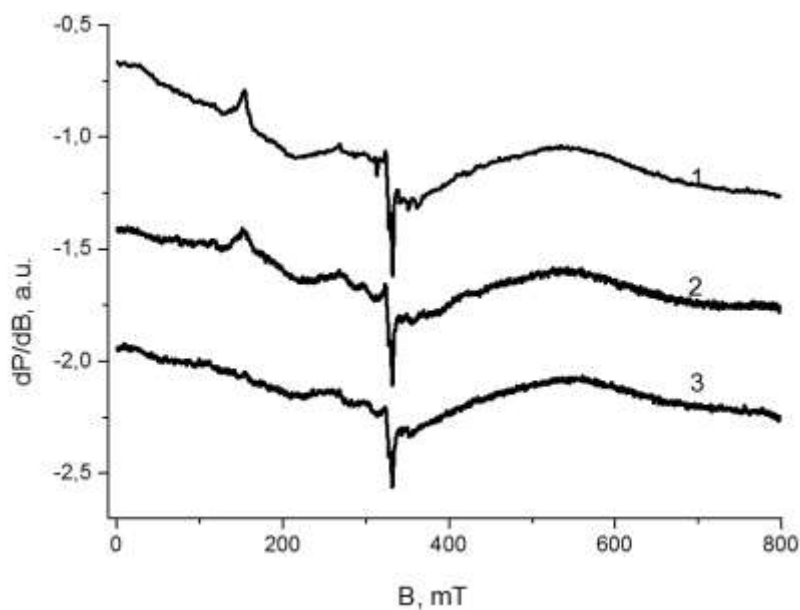

Fig. S6. EPR spectra of  $\text{Cr}^{3+}$  obtained after solvent extraction with  $\text{HP}=2 \times 10^{-2} \text{ mol/dm}^3$  in  $[\text{C}_1\text{C}_{10}\text{im}^+][\text{Tf}_2\text{N}^-]/\text{EtG}$  (1),  $[\text{C}_1\text{C}_4\text{im}^+][\text{Tf}_2\text{N}^-]/\text{EtG}$  (2) and  $[\text{C}_1\text{C}_4\text{im}^+][\text{Tf}_2\text{N}^-]/\text{H}_2\text{O}$  (3) recorded in frozen solutions: MP phase –  $[\text{Cr}^{3+}]_{\text{in}}=1 \times 10^{-3} \text{ mol/dm}^3$  and 0.1 MES in EtG. Calculated % E is 99.04% (1) and 99.57% (2) and below 0.5 % (3) – ICP-OES based on an average of three parallel determinations.

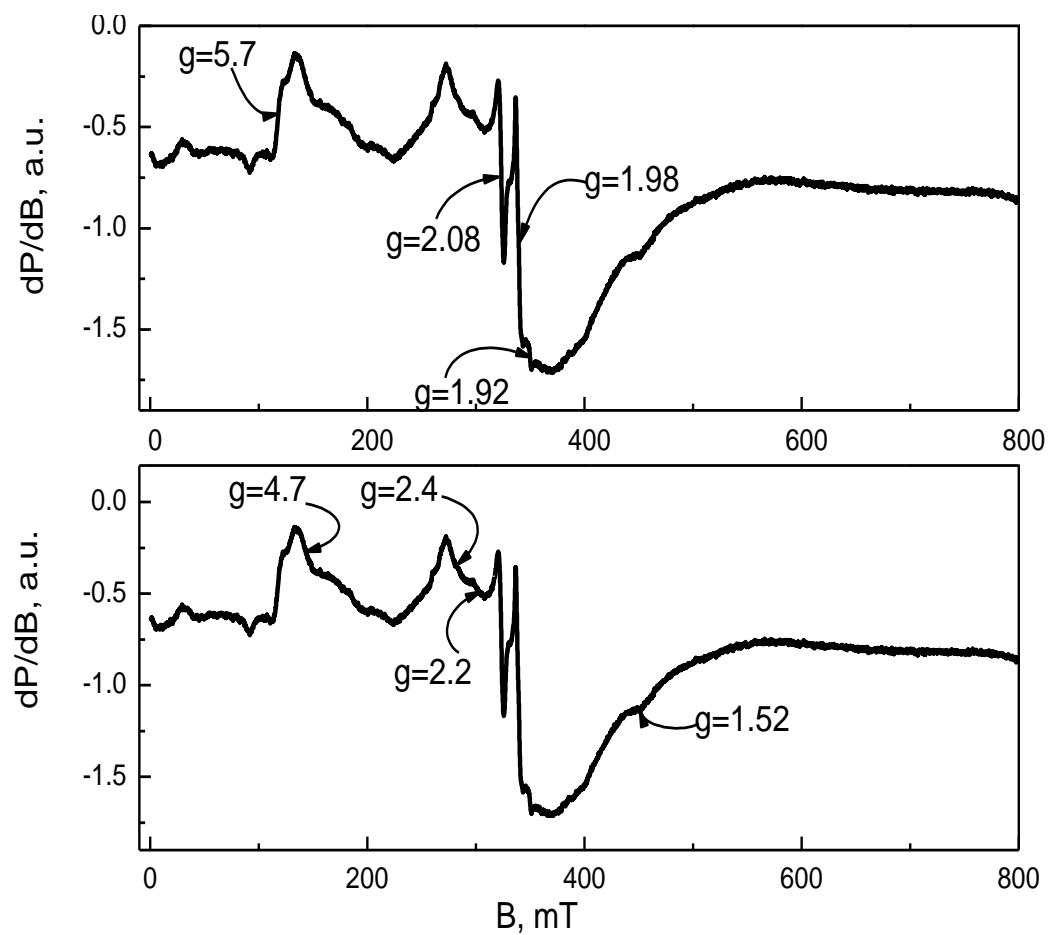

Fig. S7. EPR spectra of  $\text{Cr}^{3+}$  ion in ethylene glycol at room temperature and in the frozen state at 120 K:  $[\text{Cr}^{3+}] = 3 \times 10^{-3} \text{ mol/dm}^3$ . The  $\text{Cr}^{3+}$  concentration in the so called “standard sample” was found to be about  $4 \times 10^{-4} \text{ mol/dm}^3$  (the spectra was integrated from 0 to 500 mT.)
